# Supplementary material
Source: PubMed Central journal article supplement (PMC5011627)
Supplement: Supp_Table1.pdf [file Supp_Table1.pdf]

## Supplementary Data

SUPPLEMENTARY TABLE 1. GENES WITH  $\geq 2$ -FOLD CHANGE FROM BASELINE TO 6 H POST -SRC

| <i>Gene Symbol</i> | <i>Gene title</i>                                                                      | <i>Fold change</i> | <i>FDR-corrected p value</i> |
|--------------------|----------------------------------------------------------------------------------------|--------------------|------------------------------|
| <i>PDK4</i>        | Pyruvate dehydrogenase kinase, isozyme 4                                               | 3.12               | 0.0001                       |
| <i>MIR21</i>       | MicroRNA 21                                                                            | 2.68               | 0.0003                       |
| <i>FAM198B</i>     | Family with sequence similarity 198, member B                                          | 2.22               | 0.0007                       |
| <i>PTPRO</i>       | Protein tyrosine phosphatase, receptor type, O                                         | 2.21               | 0.0003                       |
| <i>ADAMTS5</i>     | ADAM metallopeptidase with thrombospondin type 1 motif, 5                              | 2.18               | 0.0002                       |
| <i>SLITRK4</i>     | SLIT and NTRK-like family, member 4                                                    | 2.17               | <0.0001                      |
| <i>FOLR3</i>       | Folate receptor 3 (gamma)                                                              | 2.06               | 0.0002                       |
| <i>STEAP4</i>      | STEAP family member 4                                                                  | 2.01               | 0.0002                       |
| <i>MBNL2</i>       | Muscleblind-like 2 (Drosophila)                                                        | -2.06              | 0.0001                       |
| <i>SPON2</i>       | Spondin 2, extracellular matrix protein                                                | -2.06              | 0.0006                       |
| <i>GZMB</i>        | Granzyme B (granzyme 2, cytotoxic T-lymphocyte-associated serine esterase 1)           | -2.07              | 0.0001                       |
| <i>KLF12</i>       | Kruppel-like factor 12                                                                 | -2.07              | 0.0005                       |
| <i>SYNE2</i>       | Spectrin repeat containing, nuclear envelope 2                                         | -2.08              | 0.0004                       |
| <i>GZMH</i>        | Granzyme H (cathepsin G-like 2, protein h-CCPX)                                        | -2.10              | 0.0004                       |
| <i>MYBL1</i>       | V-myb myeloblastosis viral oncogene homolog (avian)-like 1                             | -2.15              | 0.0002                       |
| <i>ZNF831</i>      | Zinc finger protein 831                                                                | -2.21              | 0.0009                       |
| <i>CDC14A</i>      | CDC14 cell division cycle 14 homolog A (S. cerevisiae)                                 | -2.22              | 0.0006                       |
| <i>TARP</i>        | TCR gamma alternate reading frame protein                                              | -2.24              | 0.0012                       |
| <i>GATA3</i>       | GATA binding protein 3                                                                 | -2.29              | 0.0009                       |
| <i>TARP /TRGC2</i> | TCR gamma alternate reading frame protein /T cell receptor gamma constant 2            | -2.31              | 0.0009                       |
| <i>CD96</i>        | CD96 molecule                                                                          | -2.32              | 0.0006                       |
| <i>PER1</i>        | Period homolog 1 (Drosophila)                                                          | -2.35              | 0.0002                       |
| <i>MGAT4A</i>      | Mannosyl (alpha-1,3-)-glycoprotein beta-1,4-N-acetylglucosaminyltransferase, isozyme A | -2.54              | 0.0005                       |
| <i>RORA</i>        | RAR-related orphan receptor A                                                          | -2.69              | 0.0002                       |
| <i>CCL4</i>        | Chemokine (C-C motif) ligand 4                                                         | -3.39              | 0.0004                       |

SRC, sports-related concussion; FDR, false discovery rate.
