# Supplementary material
Source: PubMed Central journal article supplement (PMC5011627)
Supplement: Supp_Table2.pdf [file Supp_Table2.pdf]

SUPPLEMENTARY TABLE 2. GENES WITH  $\geq 2$ -FOLD CHANGE FROM BASELINE TO 7 DAYS POST-SRC

| <i>Gene symbol</i>  | <i>Gene title</i>                                                                        | <i>Fold change</i> | <i>FDR-corrected p value</i> |
|---------------------|------------------------------------------------------------------------------------------|--------------------|------------------------------|
| EPM2AIP1            | EPM2A (laforin) interacting protein 1                                                    | 2.07               | 0.0010                       |
| PLK2                | Polo-like kinase 2                                                                       | -2.02              | 0.0011                       |
| IFRD1               | Interferon-related developmental regulator 1                                             | -2.03              | <0.0001                      |
| FCAR                | Fc fragment of IgA, receptor for                                                         | -2.04              | 0.0002                       |
| KLF10               | Kruppel-like factor 10                                                                   | -2.05              | <0.0001                      |
| KRAS                | V-Ki-ras2 Kirsten rat sarcoma viral oncogene homolog                                     | -2.05              | 0.0008                       |
| CCNL1               | Cyclin L1                                                                                | -2.07              | 0.0012                       |
| LOC338758           | Hypothetical LOC338758                                                                   | -2.09              | <0.0001                      |
| TPP2                | Tripeptidyl peptidase II                                                                 | -2.10              | 0.0001                       |
| SOCS3               | Suppressor of cytokine signaling 3                                                       | -2.11              | 0.0011                       |
| EIF1                | Eukaryotic translation initiation factor 1                                               | -2.13              | <0.0001                      |
| FFAR2               | Free fatty acid receptor 2                                                               | -2.14              | 0.0007                       |
| STAT3               | Signal transducer and activator of transcription 3<br>(acute-phase response factor)      | -2.17              | <0.0001                      |
| BCL10               | B-cell CLL/lymphoma 10                                                                   | -2.20              | 0.0002                       |
| TP53INP2            | Tumor protein p53 inducible nuclear protein 2                                            | -2.23              | 0.0002                       |
| TMEM107             | Transmembrane protein 107                                                                | -2.27              | 0.0006                       |
| MXD1                | MAX dimerization protein 1                                                               | -2.33              | <0.0001                      |
| PRO2852             | Hypothetical protein PRO2852                                                             | -2.35              | 0.0011                       |
| TUBB2A              | Tubulin, beta 2A                                                                         | -2.46              | 0.0001                       |
| ZBTB24              | Zinc finger and BTB domain containing 24                                                 | -2.52              | 0.0004                       |
| PHACTR1             | Phosphatase and actin regulator 1                                                        | -2.53              | 0.0006                       |
| EGR2                | Early growth response 2                                                                  | -2.74              | 0.0005                       |
| PHLDA2              | Pleckstrin homology-like domain, family A, member 2                                      | -2.74              | <0.0001                      |
| LOC399900           | Hypothetical LOC399900                                                                   | -2.86              | <0.0001                      |
| DUSP1               | Dual specificity phosphatase 1                                                           | -2.90              | <0.0001                      |
| TNF                 | Tumor necrosis factor                                                                    | -2.91              | 0.0005                       |
| PTGS2               | Prostaglandin-endoperoxide synthase 2<br>(prostaglandin G/H synthase and cyclooxygenase) | -3.17              | 0.0002                       |
| IL1B                | Interleukin 1, beta                                                                      | -3.19              | 0.0005                       |
| EGR3                | Early growth response 3                                                                  | -3.33              | <0.0001                      |
| NAMPT               | Nicotinamide phosphoribosyltransferase                                                   | -4.05              | 0.0005                       |
| JUN                 | Jun proto-oncogene                                                                       | -4.73              | <0.0001                      |
| CCL3/CCL3L1/ CCL3L3 | Chemokine (C-C motif) ligand 3/chemokine<br>(C-C motif) ligand 3-like 1/chemokine        | -6.00              | <0.0001                      |
| G0S2                | G0/G1switch 2                                                                            | -7.72              | <0.0001                      |

SRC, sports-related concussion; FDR, false discovery rate.
